# Supplementary material
Source: publisher figshare collection journal article supplement (https://plos.figshare.com/ndownloader/files/31575272)
Supplement: Supplementary file [file 31575272]

**Table S2:** Calculated effects of point mutations on the constitutive activity (expressed as the shift in the distribution between R and R\*,  $\Delta\Delta G_{R^* \rightarrow R}$ ), and on the relative affinity of each ligand for the active receptor ( $\Delta\Delta G_{\text{bind}, R^*}$ ). The effect of the mutation on the change in efficacy is calculated by adding these two values, according to the thermodynamic cycle shown in Fig. 5 ( $\Delta\Delta G_{\text{EC50}}$ ).

| CGS21680               |              |                  |                                |                                      |                    |                                    |              |                                |                    | LUF5834                            |              |                                |                        |
|------------------------|--------------|------------------|--------------------------------|--------------------------------------|--------------------|------------------------------------|--------------|--------------------------------|--------------------|------------------------------------|--------------|--------------------------------|------------------------|
| Mutant                 | $\Delta G_R$ | $\Delta G_{R^*}$ | Basal activity                 | Internal Efficacy change             |                    |                                    |              |                                |                    | Internal Efficacy                  |              |                                |                        |
|                        |              |                  |                                | $\Delta\Delta G_{R^* \rightarrow R}$ | $\Delta G_{R^*-L}$ | $\Delta\Delta G_{\text{bind},R^*}$ | Calc         |                                | $\Delta G_{R^*-L}$ | $\Delta\Delta G_{\text{bind},R^*}$ | Calc         |                                |                        |
|                        |              |                  | $\Delta\Delta G_{\text{EC}50}$ |                                      |                    |                                    | Experimental | $\Delta\Delta G_{\text{EC}50}$ |                    |                                    | Experimental |                                |                        |
|                        |              |                  |                                |                                      |                    |                                    |              |                                |                    |                                    |              | $\Delta\Delta G_{\text{EC}50}$ | *fold EC <sub>50</sub> |
| T88 <sup>3.36</sup> A  | -2.64 ± 0.29 | 1.34 ± 0.16      | 3.98 ± 0.33                    | 3.51± 0.16                           | 2.17 ± 0.23        | 6.15 ± 0.33                        | 4.43         | 1700                           | -2.87±0.21         | -4.21 ± 0.26                       | -0.23 ± 0.36 | -0.13                          | 0.8                    |
| S277 <sup>7.42</sup> A | -7.37 ± 0.59 | -7.34 ± 0.06     | 0.03 ± 0.59                    | -5.62± 0.38                          | 1.72 ± 0.38        | 1.75 ± 0.70                        | 2.80         | 110                            | -9.31±0.36         | -1.97 ± 0.36                       | -1.94 ± 0.69 | -0.55                          | 0.4                    |

\* Data extracted from [1].

## Reference

1. Lane JR, Herenbrink CK, Van Westen GJP, Spoorendonk JA, Hoffmann C, IJzerman AP. A novel nonribose agonist, LUF5834, engages residues that are distinct from those of adenosine-like ligands to activate the adenosine A 2a receptor. Mol Pharmacol. 2012;81(3):475–87.
